# Supplementary material for: Phenotyping and outcome on contemporary management in a German cohort of patients with peripartum cardiomyopathy
Source: Basic Res Cardiol. 2013 Jun 28;108(4):366. doi: 10.1007/s00395-013-0366-9 (PMC3709080; doi:10.1007/s00395-013-0366-9)
Supplement: Supplementary file 1 — Supplementary material 1 (DOC 144 kb) [file 395_2013_366_MOESM1_ESM.doc]

**Phenotyping and outcome on contemporary management in a German cohort of patients with peripartum cardiomyopathy**

1A. Haghikia#, 1E. Podewski#, 2,3E. Libhaber, 1S. Labidi, 1D. Fischer, 1P. Roentgen, 4D. Tsikas, 4J. Jordan, 5R. Lichtinghagen, 6C.S. von Kaisenberg, 7I. Struman, 7N.Bovy 2K. Sliwa*, 1J. Bauersachs*, 1Denise Hilfiker-Kleiner*

1Department of Cardiology and Angiology, Medical School Hannover, Germany

2Hatter Cardiovascular Research Institute, Department of Medicine, Faculty of Health Sciences, University of Cape Town, South Africa

3School of Clinical Medicine, University of the Witwatersrand, Johannesburg, South Africa

4Department of Clinical Pharmacology, Medical School Hannover, Germany

5Department of Clinical Chemistry, Medical School Hannover, Germany

6Department of Gynecology and Prenatal Medicine, Medical School Hannover, Germany

7Unit of Molecular Biology and Genetic Engineering, GIGA, University of Liège, Liège, Belgium

# The first and second author contributed equally

* The three last authors contributed equally

Corresponding author:

Denise Hilfiker-Kleiner, PhD

Department of Cardiology and Angiology

Medical School Hannover

Carl-Neuberg-Str. 1

30625 Hannover, Germany

Phone: +49-511-532-2531, Fax: +49-511-532-3263

E-mail: Hilfiker.denise@mh-hannover.de

**Supplementary Data**

**Table 1:** Baseline characteristics in all PPCM patients

| Variables: | Number of patients | All patients, |
| --- | --- | --- |
| Age(years) (mean±SD) | 113 | 34± 6 |
| Gravida Median (range) | 95 | 2 (1-11) |
| Parity Median (range) | 97 | 2 (0-9) |
| NYHA: n, (%)  n: II  n: III  n: IV | 93 | n=14 (15%)  n=30 (32%)  n=49 (53%) |
| Heart rate bpm (mean±SD) | 67 | 96 ±27 |
| LVEDD (mm) (mean±SD) | 75 | 61 ± 8 |
| LVEF (%) (mean±SD) | 115 | 27 ± 9 |
| Prolactin (ng/ml)  Median (range) | 50 | 17 (0.7-258) |
| CRP (mg/l) Median (range) | 72 | 9.8 (0.1-219) |
| Total cholesterol mg/dl) Median (range) | 37 | 209 (7.8-451) |
| AST (U/l) Median (range) | 71 | 30 (12-263) |
| ALT (U/l) Median (range) | 70 | 28 (8-441) |
| GGT (U/l) Median (range) | 55 | 27 (4-603) |
| Creat (µmol/l) Median (range) | 66 | 75.5 (0.7-344) |
| TSH mU/l Median (range) | 69 | 1.9 (0.01-10.9) |
| CK (U/l) Median (range) | 63 | 62 (0.9-1654) |
| TnT (µg/l) Median (range) | 49 | 0.02 (0.01-70) |
| Hb(g/dl) (mean±SD) | 76 | 11.6 ±1.8 |

Data for all patients are provided at baseline with the number of patients (n) analyzed behind each values.

**Supplementary Table 2:** Serum levels of NT-proBNP. Cathepsin D and ADMA in PPCM at baseline in comparison with healthy postpartum controls.

|  | PPCM | Control | p-value* |
| --- | --- | --- | --- |
| NT-proBNP (median and range) | 3315 (875-26082), n=69 | 61 (24-531), n=19 | <0.0001 |
| Cathepsin D (median and range | 186 (72-821), n=43 | 109(82-144), n=19 | <0.0001 |
| ADMA (median and range | 0.68 (0.36-1.70), n=34 | 0.51 (0.30-0.72), n=19 | <0.0008 |

**Supplementary Table 3:** Baseline characteristics in PPCM of patients with and without hypertensive conditions during pregnancy

|  | PPCM with HT | PPCM without HT | p-value |
| --- | --- | --- | --- |
| Age (years)* | 33.1±6.4 (n=49) | 34.5± 5.7 (n=62) | 0.21 |
| Gravida Median(range) | 2(1-11) (n=43) | 2(1-9) (n=51) | 0.42 |
| Parity Median(range) | 2 (0-9) (n=43) | 2(1-8)(n=53) | 0.87 |
| NYHA functional class (I-IV)  (n) | I 1  II 4  III 17  IV 18 | I 0  II 12  III 16  IV 25 | 0.21 |
| Systolic blood pressure* (mmHg) | 119± 26 (n=24) | 116± 18 (n=32) | 0.84 |
| Diastolic blood pressure*  (mmHg) | 78± 19 (n=24) | 76± 15 (n=32) | 0.73 |
| Heart rate (bpm)* | 94± 29 (n=25) | 97± 24 (n=42) | 0.28 |
| Left ventricle, end-diastolic diameter (mm)* | 59.6± 8.1(n=33) | 62.2± 8.5(n=42) | 0.19 |
| Left ventricle, end-systolic diameter (mm)* | 49.9± 9.5(n=26) | 53.2± 8.7(n=31) | 0.13 |
| LVEF (%)* | 28.1± 8.8(n=50) | 25.5± 9.1(n=62) | 0.13 |
| ADMA (mol/l) Median(range) | 0.73 (0.36-1.70)  (n=17) | 0.63 (0.39-0.86) (n=17) | 0.33 |
| Prolactin(ng/ml) Median(range) | 22(8-258)(n=19) | 10.3(1-202) (n=31) | 0.08 |
| Cathepsin D (% activity of control) Median(range) | 177(105-821) (n=23) | 192(72-388) (n=20) | 0.43 |
| CRP (mg/l) Median(range) | 18.5 (0.4-142) (n=31) | 9.6(0.1-219) (n=41) | 0.65 |
| **Log NT-proBNP (pmol/ml)*** | 8.4± 1.3(n=29) | 8.0±1.0(n=40) | **0.037** |
| Total Cholesterol (mg/dl) Median(range) | 224(7.8-352) (n=15) | 203.5 (92-451) (n=22) | 0.54 |
| CK (U/l) Median(range) | 62 (0.9-1560) (n=27) | 62(17-1654) (n=36) | 0.93 |

*Data presented as mean±SD

HT: Hypertensive conditions during pregnancy such as pregnancy-induced hypertension, preeclampsia and/or HELLP. Number of patient evaluated is provided behind each value. P-value compared patients with HT vs patients without HT during pregnancy.

**Supplementary Table 4: Baseline characteristics in PPCM patients with and without bromocriptine treatment**

|  | BR-group | Non-BR-group | p-value |
| --- | --- | --- | --- |
| Age (years)* | 33.8 ±6.4 (n=72) | 34.1 ±5.4(n=36) | 0.99 |
| Gravida Median(range) | 2 (1-9) (n=65) | 2 (1-11) (n=28) | 0.68 |
| Parity Median(range) | 2 (1-8) (n=65) | 2 (0-9) (n=30) | 0.98 |
| Caesarean -Section n,(%) | 48/65 (74) | 15/25(60) | 0.20 |
| NYHA n,(%)  I  II  III  IV | 1(2)  11 (19)  22 (37)  25 (42) | 5 (15)  11 (32)  8 (53) | 0.82 |
| Smoking n,(%) | 24/50 (48) | 8/21(38) | 0.60 |
| Systolic blood pressure (mmHg)* | 115 ±19(n=33) | 120 ±24(n=23) | 0.62 |
| Diastolic blood pressure (mmHg)* | 77 ±15(n=32) | 77 ±19(n=24) | 0.78 |
| Heart rate (bpm)* | 98±22 (n=39) | 93 ±30(n=28) | 0.36 |
| LVEDD (mm)* | 60.3 ±7.2(n=48) | 62.3 ±10.1(n=27) | 0.42 |
| LVESD (mm)* | 51.8 ±8.9(n=40) | 51.9 ±10.1(n=27) | 0.65 |
| LVEF (%)* | 27 ±9(n=73) | 26 ±10(n=36) | 0.43 |
| ADMA (mol/l) Median(range) | 0.69(0.36-1.70) (n=32) | 0.63(0.45-1.64) (n=9) | 0.88 |
| Prolactin (ng/ml) Median(range) | 16.5 (070-213.7) (n=38) | 25.6 (4.7-258) (n=12) | 0.42 |
| Cathepsin D (% activity of control) Median(range) | 186 (72-388) (n=32) | 152 (105-821) (n=11) | 0.48 |
| CRP (mg/l) Median(range) | 9.8 (0.5-219) (n=50) | 8.5 (0.1-147) (n=22) | 1.00 |
| Log NT-proBNP (pmol/ml) | 8.3 ±0.9(n=53) | 7.6 ±1.7(n=16) | 0.03 |
| Total cholesterol (mg/dl) Median(range) | 212 (718-352) (n=23) | 200.5 (92-451) (n=14) | 0.37 |
| TnT (µg/l) Median(range) | 0.02 (0.01-70) (n=35) | 0.01(0.01-38.00) (n=14) | 0.18 |
| CK (U/l) Median(range) | 64 (0.9-1654) (n=43) | 54.5 (10-1560) (n=20) | 0.37 |
| AST (U/l) Median(range) | 29 (12-263) (n=51) | 36 (17-197) (n=20) | 0.37 |
| GGT (U/l) Median(range) | 30.5(4-603) (n=40) | 19 (7-157) (n=15) | 0.15 |
| Hb (g/dl)* | 11.4 ±1.8(n=55) | 12.0 ±2.0(n=21) | 0.43 |

***** Data presented as mean±SD. Cathepsin D activity has been calculated in % of the mean of healthy postpartum controls. P-value compared BR-group vs non-BR-group.

**
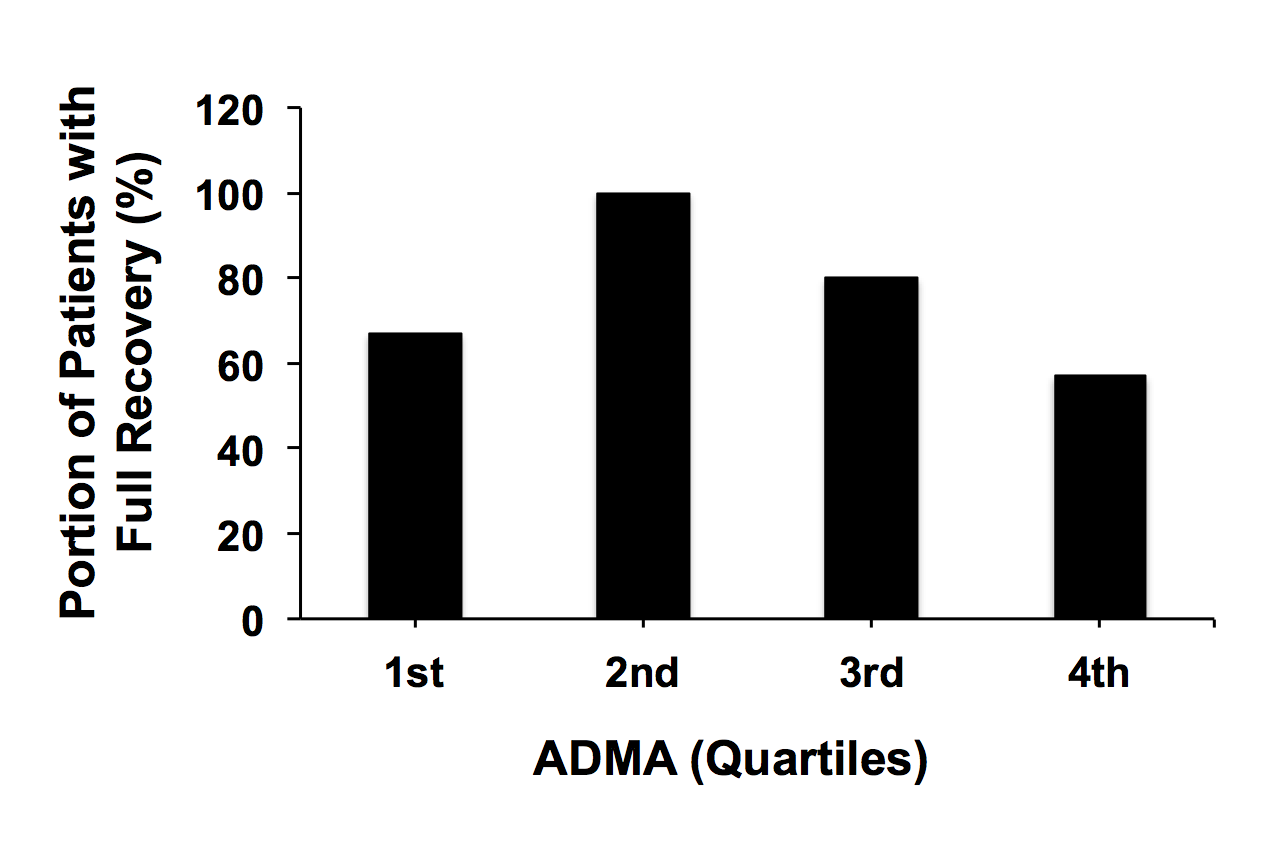
**

**Supplementary Figure 1:** Bar graph depicting the portion of the patients of each quartile with a full cardiac recovery (cut-off values: 1st Quartile: 0.52 µmol/l, n=7; 2nd Quartile: 0.59 µmol/l, n=2, 3rd Quartile: 0.69 µmol/l, n=5; 4th Quartile: 0.85 µmol/l, n=7). No significant differences were observed between groups.
